# Supplementary material for: A 3D mammalian cell separator biochip
Source: Royal Society of Chemistry journal article supplement (doi:10.1039/c2lc20939j), 2012-01-01

FACS live/dead analysis data for the control showing the variation of Thiazole Orange fluorescence with that of Propidium Iodide

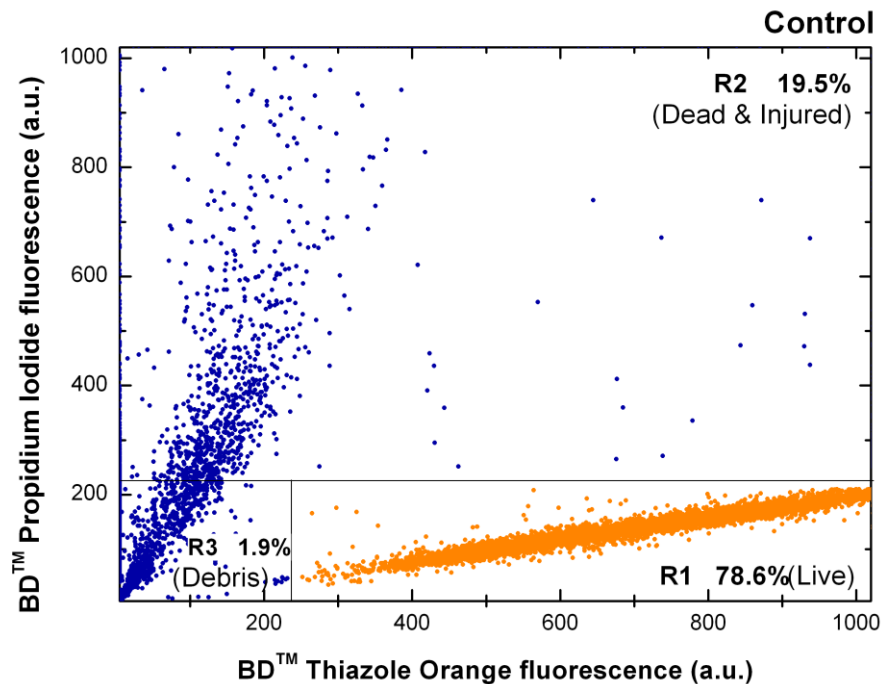

FACS live/dead analysis data for the device output showing the variation of Thiazole Orange fluorescence with that of Propidium Iodide

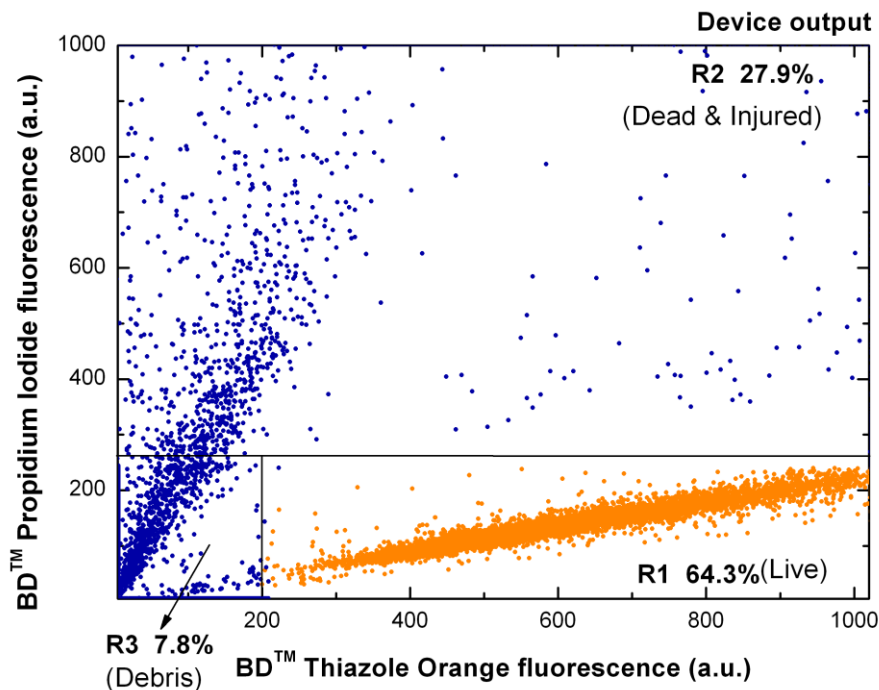

Supplement: c2lc20939j.pdf [file c2lc20939j.pdf]
